# Supplementary material for: Unravelling the Diversity of Microorganisms in Ticks from Australian Wildlife
Source: MDPI journal article supplement (doi:10.3390/pathogens12020153), 2023-01-17
Supplement: s1 [file s1]

## Supplementary material

**Table S1**

Details of target genetic markers used for testing microorganisms in ticks DNA

| Target microorganism (Genus/Phylum) | Target microorganism (species)                                                                                  | Genetic marker (s) |
|-------------------------------------|-----------------------------------------------------------------------------------------------------------------|--------------------|
| <i>Anaplasma</i>                    | <i>Anaplasma</i> (A.) spp.                                                                                      | 16S                |
|                                     | <i>A. marginale</i>                                                                                             | <i>msp1</i>        |
|                                     | <i>A. platys</i>                                                                                                | <i>groEL</i>       |
|                                     | <i>A. phagocytophilum</i>                                                                                       | <i>msp2</i>        |
|                                     | <i>A. ovis</i>                                                                                                  | <i>msp4</i>        |
|                                     | <i>A. centrale</i> , <i>A. bovis</i>                                                                            | <i>groEL</i>       |
| Apicomplexa                         | Apicomplexa spp.                                                                                                | 18S                |
| <i>Aegyptianella</i>                | <i>Aegyptianella pullorum</i>                                                                                   | <i>groEL</i>       |
| <i>Babesia</i>                      | <i>Babesia</i> (B.) <i>microti</i> , <i>B. bovis</i>                                                            | CCTeta             |
|                                     | <i>B. ovis</i> , <i>B. bigemina</i> , <i>Babesia</i> sp. EU1, <i>B. venatorum</i>                               | 18S                |
|                                     | <i>B. divergens</i> , <i>B. canis</i>                                                                           | <i>hsp70</i>       |
|                                     | <i>B. caballi</i> , <i>B. gibsoni</i>                                                                           | <i>rap1</i>        |
|                                     | <i>B. duncani</i>                                                                                               | ITS2               |
| <i>Bartonella</i>                   | <i>Bartonella</i> (Ba.) spp.                                                                                    | <i>ssrA</i>        |
|                                     | <i>Ba. henselae</i>                                                                                             | <i>pap31</i>       |
|                                     | <i>Ba. barcilliformis</i>                                                                                       | <i>rpoB</i>        |
|                                     | <i>Ba. vinsonii</i> subsp. <i>berkhoffii</i>                                                                    | ITS                |
| <i>Borrelia</i>                     | <i>Borrelia</i> (Bo.) spp.                                                                                      | 23S                |
|                                     | <i>Bo. miyamotoi</i> , <i>Bo. lonestari</i> , <i>Bo. theileri</i>                                               | <i>glpQ</i>        |
|                                     | <i>Bo. anserina</i> , <i>Bo. afzelii</i> , <i>Bo. spielmanii</i>                                                | <i>fla</i>         |
|                                     | <i>Bo. burgdorferi</i> s.s., <i>Bo. garinii</i> , <i>Bo. lusitaniae</i> , <i>Bo. bissettii</i>                  | <i>rpoB</i>        |
|                                     | <i>Bo. parkeri</i>                                                                                              | <i>gyrB</i>        |
|                                     | <i>Bo. turicatae</i>                                                                                            | ITS                |
|                                     | <i>Bo. valaisiana</i>                                                                                           | <i>ospA</i>        |
| <i>Mycoplasma</i>                   | <i>Mycoplasma</i> (M) spp., <i>Candidatus Mycoplasma</i> (C.M.) <i>haemominutum</i> , <i>C.M. haematoparvum</i> | 16S                |
|                                     | <i>M. wenyonii</i> , <i>M. haemocanis</i>                                                                       | 23S                |
|                                     | <i>M. haemofelis</i>                                                                                            | <i>dnaK</i>        |
|                                     | <i>M. ovis</i> , <i>M. suis</i> , <i>C.M. turicensis</i>                                                        | <i>rnpB</i>        |
| <i>Coxiella</i>                     | <i>Coxiella</i> (C.) <i>burnetii</i>                                                                            | IS1111, <i>icd</i> |
| <i>Cytauxzoon</i>                   | <i>Cytauxzoon felis</i>                                                                                         | ITS2               |

|                    |                                                                                                                                    |                           |
|--------------------|------------------------------------------------------------------------------------------------------------------------------------|---------------------------|
| <i>Ehrlichia</i>   | <i>Ehrlichia</i> (E.) spp.                                                                                                         | 16S                       |
|                    | <i>E. ruminatum</i> , Panola Mountain <i>Ehrlichia</i> , <i>E. canis</i>                                                           | <i>gltA</i>               |
|                    | <i>E. chaffeensis</i> , <i>E. ewingii</i>                                                                                          | <i>dsb</i>                |
| <i>Hepatozoon</i>  | <i>Hepatozoon</i> (H.) spp, <i>H. americanum</i> , <i>H. canis</i>                                                                 | 18S                       |
| <i>Francisella</i> | <i>Francisella</i> spp.                                                                                                            | <i>tul4</i> , <i>fopA</i> |
| <i>Leishmania</i>  | <i>Leishmania</i> (L.) spp.                                                                                                        | <i>hsp70</i>              |
|                    | <i>L. infantum</i>                                                                                                                 | ITS                       |
| <i>Rangelia</i>    | <i>Rangelia vitalli</i>                                                                                                            | 18S                       |
| <i>Rickettsia</i>  | <i>Rickettsia</i> (R.) spp., <i>R. prowazekii</i>                                                                                  | <i>gltA</i>               |
|                    | <i>R. parkeri</i>                                                                                                                  | <i>ompA</i>               |
|                    | <i>R. felis</i>                                                                                                                    | <i>orfB</i>               |
|                    | <i>R. akari</i> , <i>R. typhi</i> , <i>R. andeanae</i>                                                                             | <i>ompB</i>               |
|                    | <i>R. rickettsii</i> , <i>R. conorii</i> , <i>R. slovaca</i> , <i>R. massiliae</i> , <i>R. helvetica</i> , <i>R. aeschlimannii</i> | ITS                       |
|                    | <i>R. africae</i>                                                                                                                  | <i>sca1</i>               |
|                    | <i>Neorickettsia</i> sp.                                                                                                           | <i>groEL</i>              |
|                    |                                                                                                                                    |                           |
| <i>Theileria</i>   | <i>Theileria</i> (Th.) spp., <i>Th. velifera</i> , <i>Th. parva</i>                                                                | 18S                       |
|                    | <i>Th. mutans</i>                                                                                                                  | ITS                       |
|                    | <i>Th. equi</i>                                                                                                                    | <i>ema1</i>               |
| <i>Wolbachia</i>   | <i>Wolbachia</i> spp.                                                                                                              | <i>wsp</i>                |

**Table S2**

Host and location details of ticks tested and the real-time PCR cycle threshold (ct) values for microorganisms detected in this study.

| Ticks                      | Host                      | Location           | Lab ID | <i>Ehrlichia</i> sp. | <i>Rickettsia</i> sp. | <i>Bartonella</i> sp. | <i>Coxiella</i> -like sp. | Apicomplexa | <i>Theileria</i> sp. | <i>Hepatozoon</i> sp. |
|----------------------------|---------------------------|--------------------|--------|----------------------|-----------------------|-----------------------|---------------------------|-------------|----------------------|-----------------------|
| <i>Aponomma auruginans</i> | Bare-nosed wombat         | Wilsons Promontory | 11     | -                    | -                     | -                     | +12.38                    | +19.42      | -                    | -                     |
|                            |                           |                    | 12     | -                    | +26.42                | -                     | +22.12                    | +21.54      | -                    | -                     |
| <i>Ixodes antechini</i>    | Agile antechinus          | Boho South         | 23     | -                    | +9.32                 | -                     | -                         | +17.44      | +24.05               | -                     |
|                            |                           |                    | 24     | -                    | +9.53                 | +19.69                | -                         | +5.28       | +7.66                | -                     |
|                            |                           |                    | 27     | +18.72               | +22.94                | +17.4                 | -                         | +5.03       | +17.6                | -                     |
|                            |                           |                    | 28     | -                    | +24.48                | +21.53                | -                         | +15.2       | +19.75               | -                     |
| <i>Ixodes kohlsi</i>       | Little penguin            | Phillip Island     | 1      | -                    | -                     | -                     | -                         | +25.4       | -                    | -                     |
|                            |                           |                    | 2      | -                    | -                     | -                     | -                         | -           | -                    | -                     |
|                            |                           |                    | 3      | -                    | -                     | -                     | -                         | +24.1       | -                    | -                     |
|                            |                           |                    | 4      | -                    | -                     | -                     | -                         | +23.78      | -                    | -                     |
|                            |                           |                    | 5      | -                    | -                     | -                     | -                         | -           | -                    | -                     |
|                            |                           |                    | 6      | -                    | -                     | -                     | -                         | +22.77      | -                    | -                     |
| <i>Ixodes tasmani</i>      | Koala                     | Portland           | 22     | -                    | +10.81                | -                     | -                         | +11.04      | +15.02               | -                     |
|                            |                           |                    | 7      | -                    | +23.97                | -                     | -                         | +23.67      | -                    | -                     |
|                            |                           |                    | 8      | -                    | -                     | -                     | -                         | +11.6       | +15.58               | -                     |
|                            |                           |                    | 9      | -                    | -                     | -                     | -                         | +22.93      | -                    | -                     |
| <i>Ixodes tasmani</i>      | Mountain brushtail possum | Boho South         | 10     | -                    | -                     | -                     | -                         | -           | -                    | -                     |
|                            |                           |                    | 14     | -                    | -                     | -                     | -                         | +16.01      | -                    | -                     |
|                            | Agile antechinus          |                    | 25     | -                    | -                     | -                     | -                         | +19.68      | -                    | -                     |
|                            | Southern brown bandicoot  | Koo Wee Rup        | 29     | -                    | +8.5                  | -                     | -                         | +16.18      | +19.84               | -                     |
|                            |                           |                    | 30     | -                    | +12.07                | -                     | -                         | +23.02      | -                    | +24.24                |
|                            |                           |                    | 31     | -                    | +10.66                | -                     | -                         | +17.59      | +23.07               | -                     |
|                            |                           |                    | 32     | -                    | +9.47                 | +24                   | -                         | +15.95      | -                    | -                     |

|                          |                           |             |    |   |         |         |         |         |         |   |
|--------------------------|---------------------------|-------------|----|---|---------|---------|---------|---------|---------|---|
|                          |                           |             | 34 | - | +/11.08 | -       | -       | +/27.45 | -       | - |
|                          |                           |             | 36 | - | +/10.5  | -       | -       | +/24.01 | -       | - |
|                          |                           |             | 37 | - | +/9.43  | +/17.54 | -       | +/17.15 | -       | - |
|                          |                           |             | 38 | - | +/9.51  | -       | -       | +/24.66 | -       | - |
| <i>Ixodes trichosuri</i> | Mountain brushtail possum | Boho South  | 13 | - | +/24.16 | -       | -       | +/4.42  | -       | - |
|                          |                           |             | 15 | - | +/8.5   | +/22.68 | +/25.86 | +/17.09 | +/22.97 | - |
|                          |                           |             | 16 | - | +/11.62 | -       | -       | +/23.28 | -       | - |
|                          |                           |             | 17 | - | -       | -       | -       | -       | -       | - |
|                          |                           |             | 18 | - | -       | -       | -       | -       | -       | - |
|                          |                           |             | 19 | - | -       | -       | -       | +/24.49 | +/23.66 | - |
|                          |                           |             | 20 | - | +/11    | -       | -       | -       | -       | - |
|                          |                           |             | 21 | - | +/24.2  | +/26.15 | -       | +/34.97 | -       | - |
|                          |                           |             | 26 | - | -       | +/27.13 | -       | +/22.35 | -       | - |
|                          |                           |             | 33 | - | +/26.07 | -       | -       | +/22.6  | -       | - |
|                          | Southern brown bandicoot  | Koo Wee Rup | 35 | - | +/24.85 | -       | -       | +/22.84 | -       | - |
|                          |                           |             | 39 | - | -       | -       | -       | +/15.29 | -       | - |
|                          |                           | Cranbourne  | 40 | - | -       | -       | -       | +/22.29 | -       | - |
|                          |                           |             | 41 | - | +/25.74 | -       | -       | +/24.84 | -       | - |
|                          |                           |             | 42 | - | -       | -       | -       | +/22.84 | -       | - |
|                          |                           |             | 43 | - | +/24.8  | -       | -       | +/20.77 | -       | - |
|                          |                           |             | 44 | - | -       | -       | -       | +/33.06 | -       | - |
|                          |                           |             | 45 | - | +/27.59 | -       | -       | -       | -       | - |

**Table S3**

Pairwise percentage nucleotide similarities of 16S ribosomal RNA sequences of *Ixodes tasmani* determined in this study

| Sequence ID | 7-2020 | 10-2020 | AD-2020 | L-2020 |
|-------------|--------|---------|---------|--------|
| 7-2020      |        | 99.7    | 85.9    | 86.5   |
| 10-2020     |        |         | 85.7    | 86.2   |
| AD-2020     |        |         |         | 98.2   |
| L-2020      |        |         |         |        |

**Table S4**

Pairwise percentage nucleotide similarities of *cox1* sequences of *Ixodes tasmani* determined in this study

| Sequence ID | 7-2020 | AD-2020 | L-2020 |
|-------------|--------|---------|--------|
| 7-2020      |        | 88.7    | 89.2   |
| AD-2020     |        |         | 98     |
| L-2020      |        |         |        |
